# Supplementary material for: Three dimensional Ti3C2 MXene nanoribbon frameworks with uniform potassiophilic sites for the dendrite-free potassium metal anodes
Source: Royal Society of Chemistry journal article supplement (doi:10.1039/d0na00515k), 2020-01-01
Supplement: d0na00515k1.pdf [file d0na00515k1.pdf]

Electronic Supplementary Material for Nanoscale Advances.

This journal is © The Royal Society of Chemistry 2020

### **Supplemental Information**

## **Three Dimensional Ti<sub>3</sub>C<sub>2</sub> MXene Nanoribbons Frameworks with Uniform Potassiophilic Sites for Dendrite-Free Potassium Metal Anodes**

Haodong Shi,<sup>abc</sup> Yanfeng Dong,<sup>d</sup> Shuanghao Zheng,<sup>ac</sup> Cong Dong,<sup>abc</sup> Zhong-Shuai Wu<sup>\*ac</sup>

#### **Affiliations:**

<sup>a</sup>State Key Laboratory of Catalysis, Dalian Institute of Chemical Physics, Chinese Academy of Sciences, 457 Zhongshan Road, Dalian 116023, China

<sup>b</sup>University of Chinese Academy of Sciences, 19 A Yuquan Rd, Shijingshan District, Beijing 100049, China

<sup>c</sup>Dalian National Laboratory for Clean Energy, Dalian Institute of Chemical Physics, Chinese Academy of Sciences, 457 Zhongshan Road, Dalian 116023, China

<sup>d</sup>Department of Chemistry, College of Sciences, Northeastern University, 3-11 Wenhua Road, Shenyang 110819, China

\*Corresponding author: wuzs@dicp.ac.cn

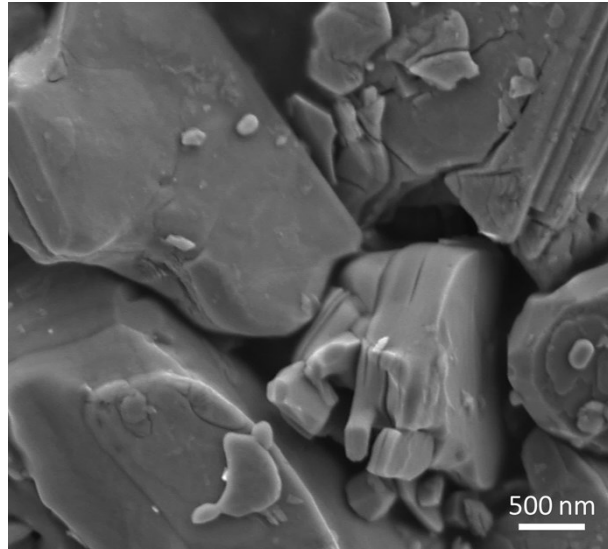

**Fig. S1** SEM image of Ti<sub>3</sub>AlC<sub>2</sub> MAX.

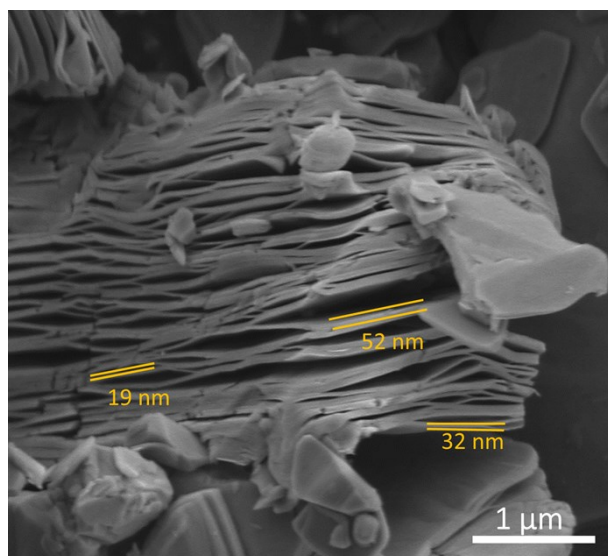

**Fig. S2** SEM image of m-Ti<sub>3</sub>C<sub>2</sub> MXene nanosheets.

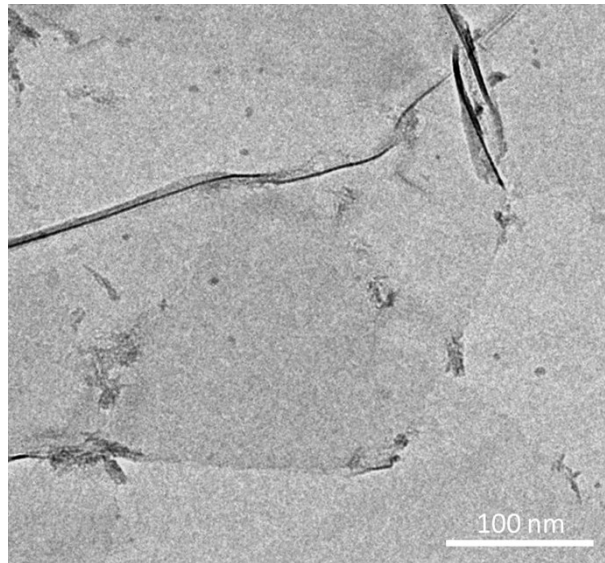

**Fig. S3** TEM image of d-Ti<sub>3</sub>C<sub>2</sub> MXene nanosheets.

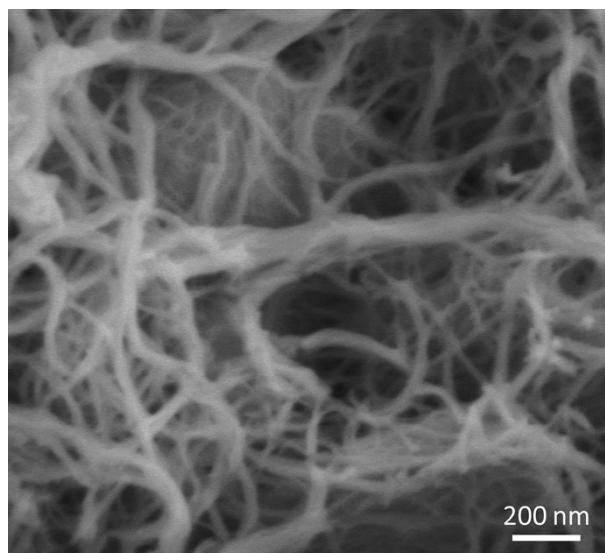

**Fig. S4** SEM image of a-Ti<sub>3</sub>C<sub>2</sub> MXene nanoribbon frameworks.

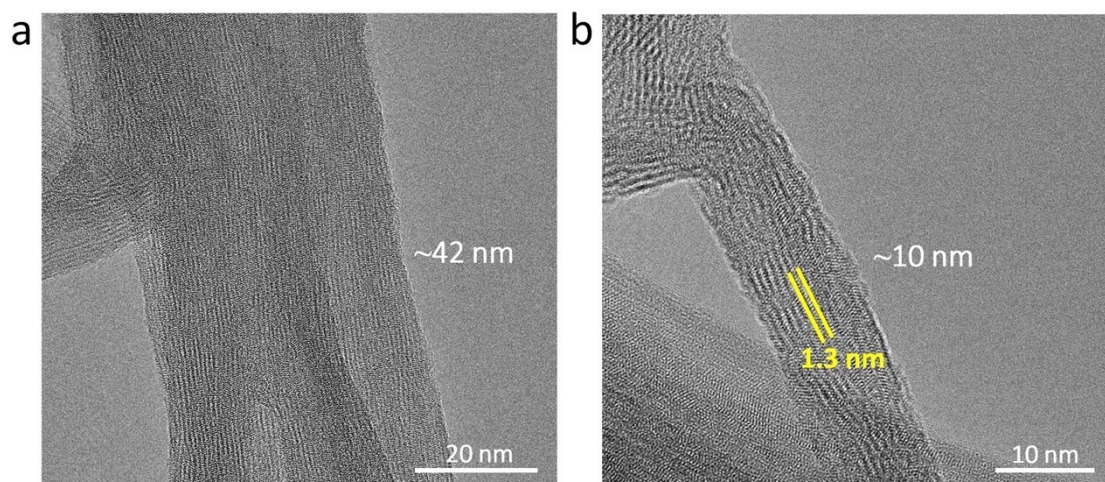

**Fig. S5** (a,b) HRTEM images of a-Ti<sub>3</sub>C<sub>2</sub> MXene nanoribbons.

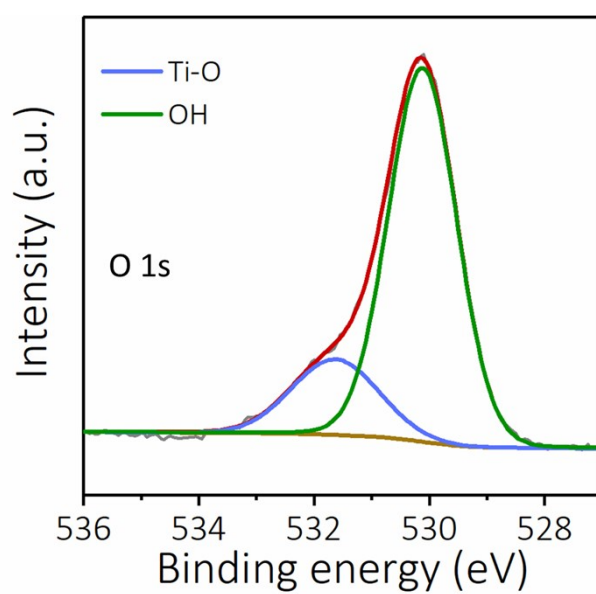

**Fig. S6** High resolution O1s XPS spectrum of a-Ti<sub>3</sub>C<sub>2</sub> nanoribbons.

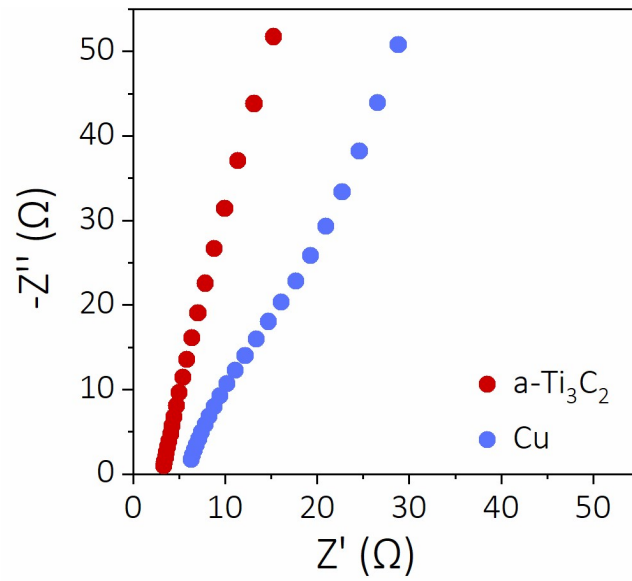

**Fig. S7** Nyquist plots of the a-Ti<sub>3</sub>C<sub>2</sub> MXene/K and bare Cu/K asymmetric batteries.

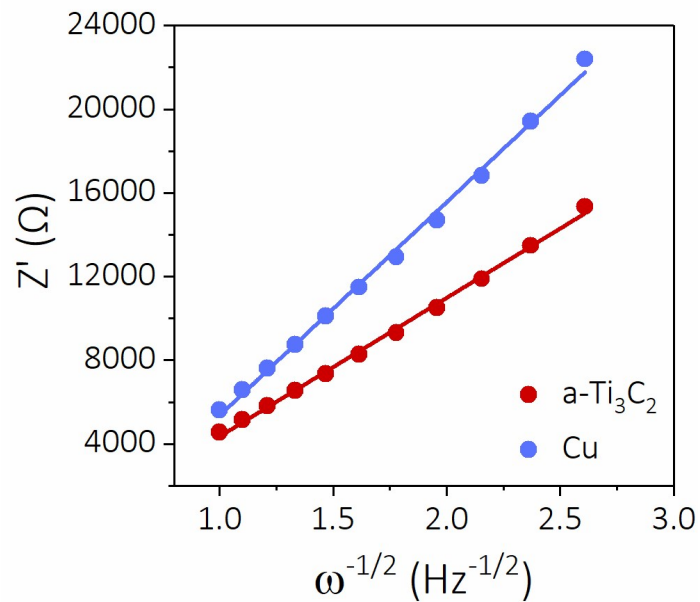

**Fig. S8** The relationship of between  $Z'$  and square root of the frequency ( $\omega^{-1/2}$ ) in the low-frequency region for the a-Ti<sub>3</sub>C<sub>2</sub> MXene/K and bare Cu/K asymmetric batteries.

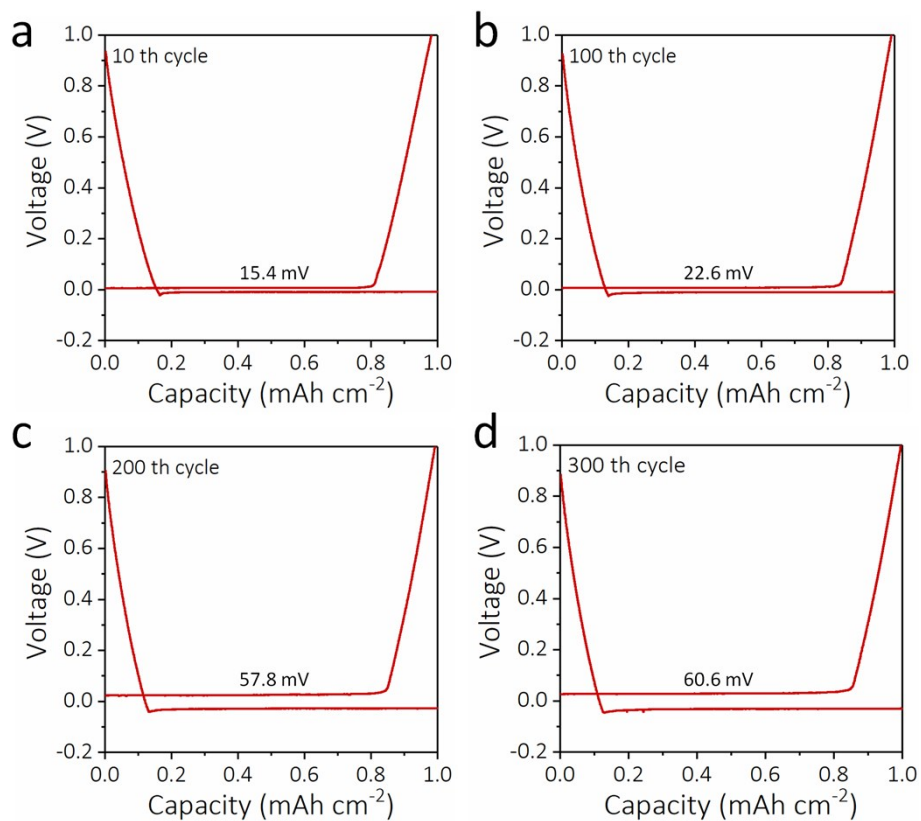

**Fig. S9** Voltage profiles of a-Ti<sub>3</sub>C<sub>2</sub> MXene electrode tested at different cycles. Plant 1 mAh cm<sup>-2</sup> of K at a current density 1 mA cm<sup>-2</sup> at (a) 10th cycle, (b) 100th cycle, (c) 200th cycle, and (d) 300th cycle.

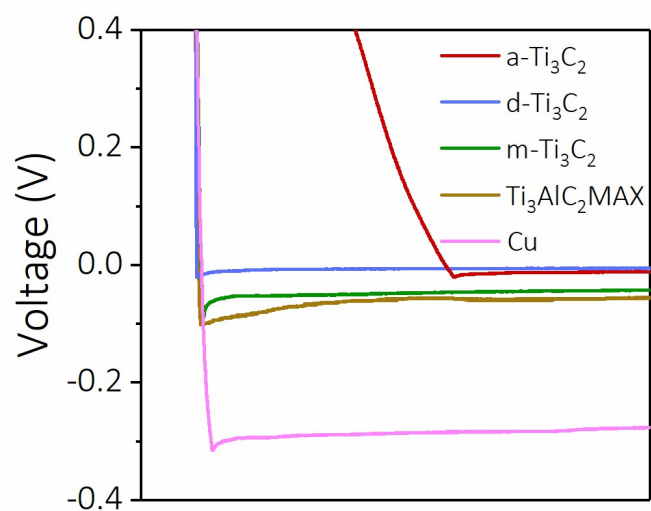

**Fig. S10** Nucleation section on the voltage profiles of a-Ti<sub>3</sub>C<sub>2</sub> MXene, d-Ti<sub>3</sub>C<sub>2</sub> MXene, m-Ti<sub>3</sub>C<sub>2</sub> MXene, Ti<sub>3</sub>AlC<sub>2</sub> MAX and bare Cu electrodes with K deposition capacity of 1 mAh cm<sup>-2</sup> at 1 mA cm<sup>-2</sup>.

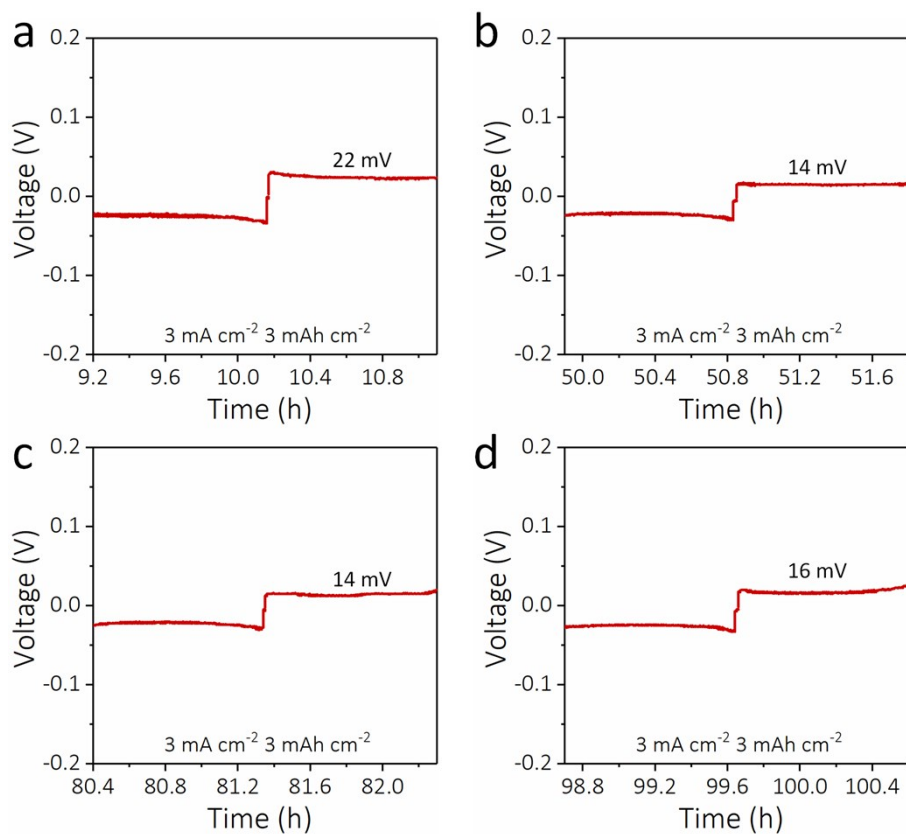

**Fig. S11** Detailed voltage profiles of a-Ti<sub>3</sub>C<sub>2</sub>-K symmetric battery at different time. Planting 3 mAh cm<sup>-2</sup> of K at current density of 3 mA cm<sup>-2</sup> for (a) 10 h, (b) 50 h, (c) 80 h, and (d) 100 h, respectively.



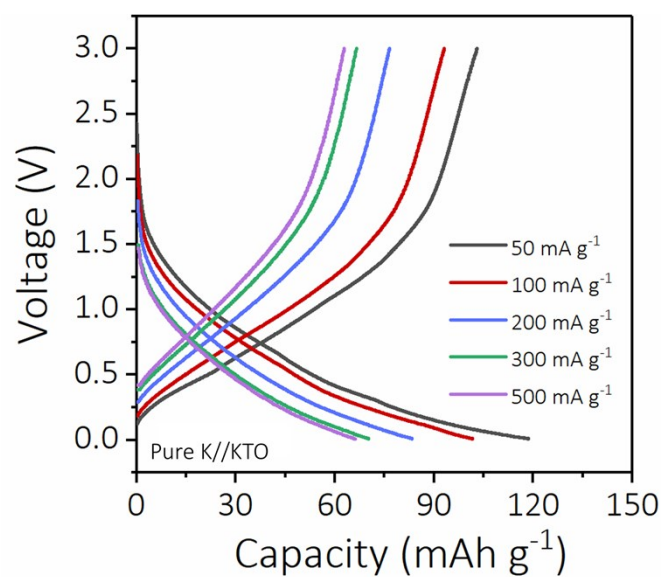

**Fig. S12** Charge and discharge profiles of pure K//KTO battery tested at different rates.

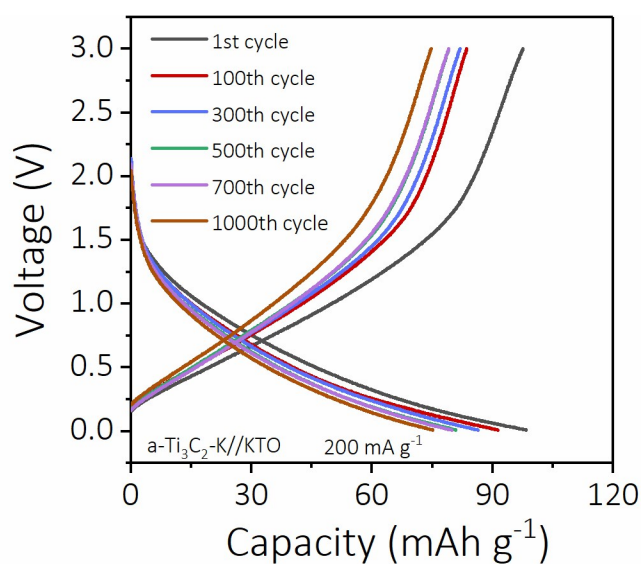

**Fig. S13** Charge and discharge profiles of a-Ti<sub>3</sub>C<sub>2</sub>-K//KTO battery obtained at different cycles at 200 mA g<sup>-1</sup>.

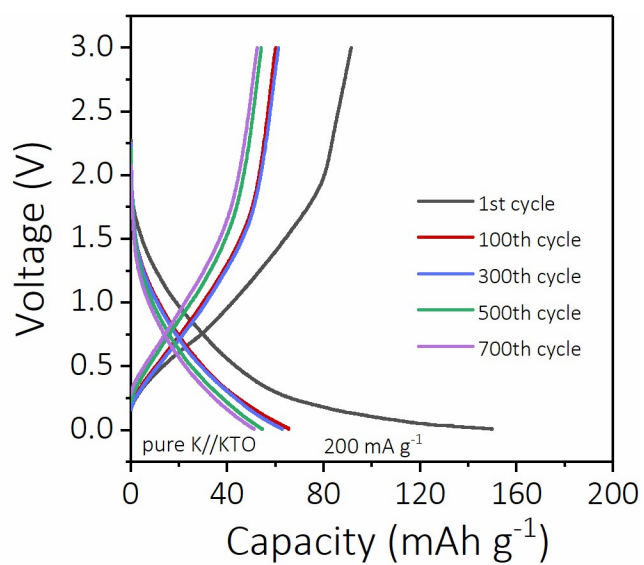

**Fig. S14** Charge and discharge profiles of pure K//KTO battery obtained at different cycles at 200 mA g<sup>-1</sup>.

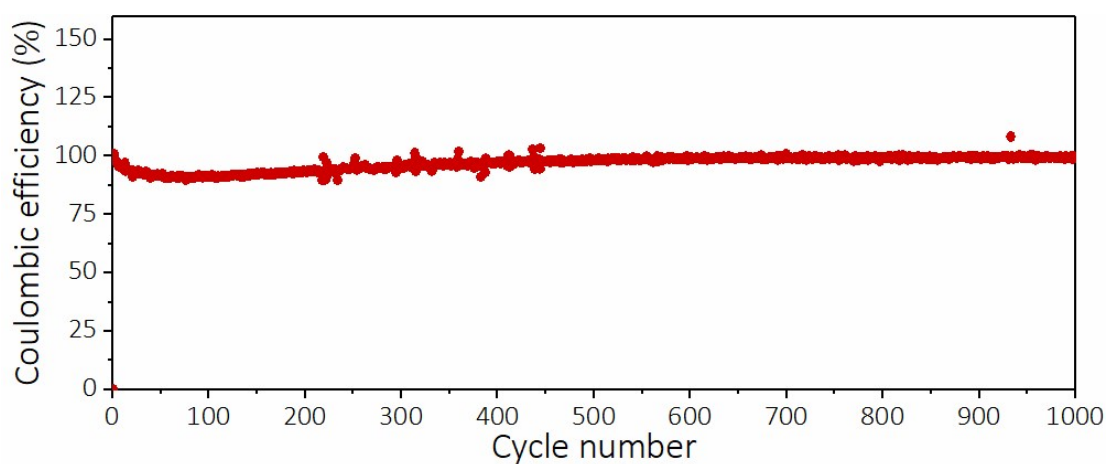

**Fig. S15** Coulombic efficiency of a-Ti<sub>3</sub>C<sub>2</sub>-K//KTO battery tested at 200 mA g<sup>-1</sup>.

**Table S1.** Performance comparison of a-Ti<sub>3</sub>C<sub>2</sub>-K electrode with the state-of-the-art K

| <b>Anode materials</b>               | <b>Current density (mA cm<sup>-2</sup>)</b> | <b>Areal capacity (mAh cm<sup>-2</sup>)</b> | <b>Cycle time (h)</b> | <b>Refs.</b>     |
|--------------------------------------|---------------------------------------------|---------------------------------------------|-----------------------|------------------|
| rGO@3D-Cu                            | 0.5                                         | 0.5                                         | 200                   | Ref. [1]         |
| ACM                                  | 5                                           | 1                                           | 58                    | Ref. [2]         |
| PCNF@SnO <sub>2</sub>                | 1                                           | 10                                          | 350                   | Ref. [3]         |
| DN-MXene/CNT                         | 0.5                                         | 0.5                                         | 300                   | Ref. [4]         |
| HNCP/G                               | 1                                           | 1                                           | 100                   | Ref. [5]         |
| PM/NiO                               | 0.4                                         | 0.1                                         | 100                   | Ref. [6]         |
| K-Hg                                 | 0.5                                         | 0.5                                         | 250                   | Ref. [7]         |
| Polished K metal                     | 0.1                                         | 0.02                                        | 80                    | Ref. [8]         |
| <b>a-Ti<sub>3</sub>C<sub>2</sub></b> | <b>5</b>                                    | <b>10</b>                                   | <b>700</b>            | <b>This work</b> |
|                                      | <b>5</b>                                    | <b>5</b>                                    | <b>800</b>            |                  |

anodes recently reported

ACM: ligned carbon nanotube membrane; PCNF@SnO<sub>2</sub>: SnO<sub>2</sub>-coated conductive porous carbon nanofiber framework; DN-MXene: defect-rich and nitrogen-containing MXene; HNCP/G: hollow N-doped C polyhedrons/graphene; PM: puffed millet.

## References

1. P. Liu, Y. Wang, Q. Gu, J. Nanda, J. Watt and D. Mitlin, *Adv. Mater.*, 2020, **32**, 1906735.
2. L. Qin, Y. Lei, H. Wang, J. Dong, Y. Wu, D. Zhai, F. Kang, Y. Tao and Q.-H. Yang, *Adv. Energy Mater.*, 2019, **9**, 1901427.
3. X. Zhao, F. Chen, J. Liu, M. Cheng, H. Su, J. Liu and Y. Xu, *J. Mater. Chem. A*, 2020, **8**, 5671-5678.
4. X. Tang, D. Zhou, P. Li, X. Guo, B. Sun, H. Liu, K. Yan, Y. Gogotsi and G. Wang, *Adv. Mater.*, 2020, **32**, 1906739.
5. M. Ye, J.-Y. Hwang and Y.-K. Sun, *ACS Nano*, 2019, **13**, 9306-9314.
6. Y. Li, L. Zhang, S. Liu, X. Wang, D. Xie, X. Xia, C. Gu and J. Tu, *Nano Energy*, 2019, **62**, 367-375.
7. Q. Yang, Y. Ding and G. He, *Chem. Commun.*, 2020, **56**, 3512-3515.
8. Y. Gu, W.-W. Wang, Y.-J. Li, Q.-H. Wu, S. Tang, J.-W. Yan, M.-S. Zheng, D.-Y. Wu, C.-H. Fan, W.-Q. Hu, Z.-B. Chen, Y. Fang, Q.-H. Zhang, Q.-F. Dong and B.-W. Mao, *Nat. Commun.*, 2018, **9**, 1339.
